# Supplementary material for: Newly proposed proton-abstraction roundabout with backside attack mechanism for the SN2 reaction at the nitrogen center in F− + NH2Cl
Source: Royal Society of Chemistry journal article supplement (doi:10.1039/c8cp01201f), 2018-01-01
Supplement: c8cp01201f1.pdf [file c8cp01201f1.pdf]

## SUPPORTING INFORMATION

### New Proposed Proton-abstracted Roundabout with Backside Attack Mechanism for the $S_N2$ Reaction at Nitrogen Center $F^- +$ $NH_2Cl$

*Yongfang Li and Dunyou Wang<sup>\*†</sup>*

College of Physics and Electronics, Shandong Normal University, Jinan Shandong  
250014, China

---

<sup>\*</sup>Author to whom correspondence should be addressed. Email: dywang@sdnu.edu.cn

CCSD(T)/aug-cc-pVTZ  
DFT/M06-2X/aug-cc-pVDZ

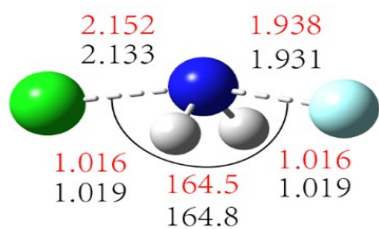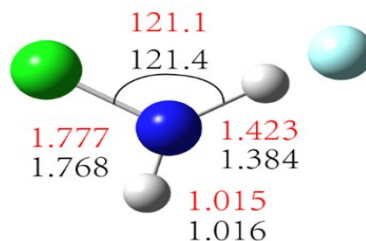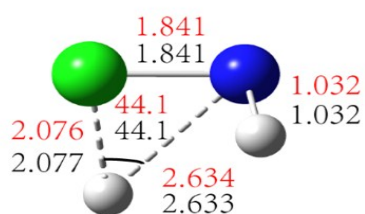

CCSD(T)/aug-cc-pVTZ  
DFT/M06-2X/aug-cc-pVDZ

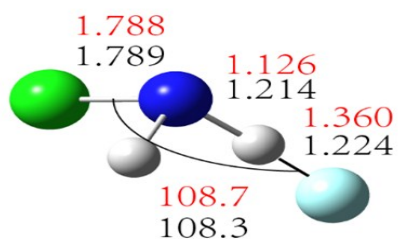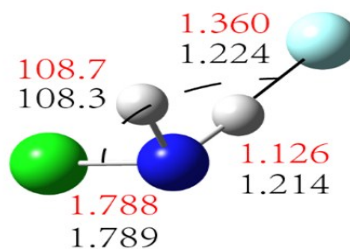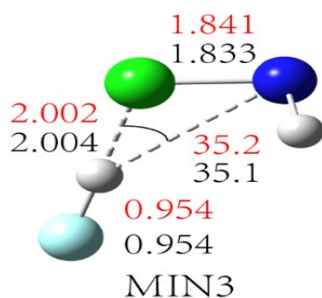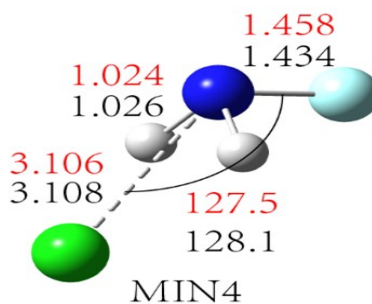

Figure.S1 Comparison of geometries of the stationary points (in Å and degrees) between the DFT/M06-2X/aug-cc-pVDZ and CCSD(T)/aug-cc-pVTZ levels of theory

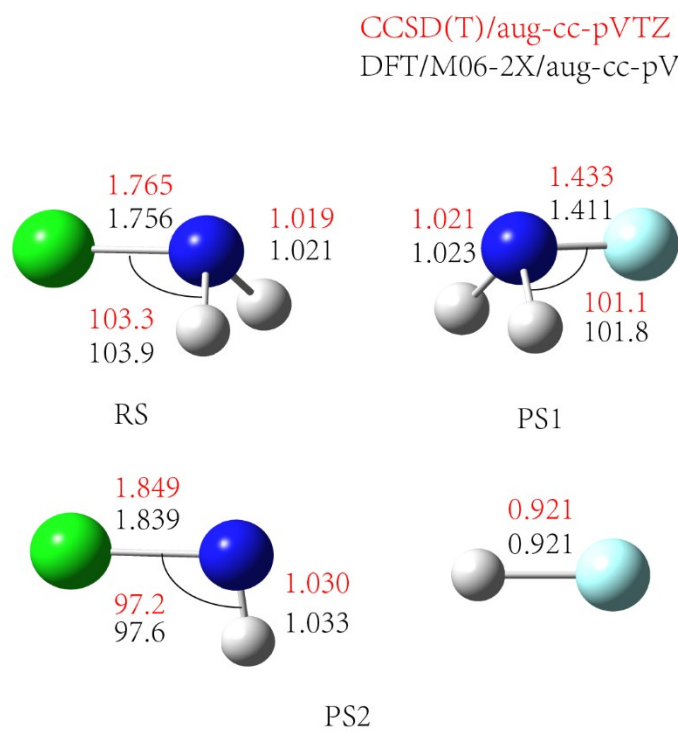

Figure S2. Comparison of gemoetries of the reactants and products (in Å and degrees) between DFT/M06-2X/aug-cc-pVDZ and CCSD(T)/aug-cc-pVTZ levels of theory.

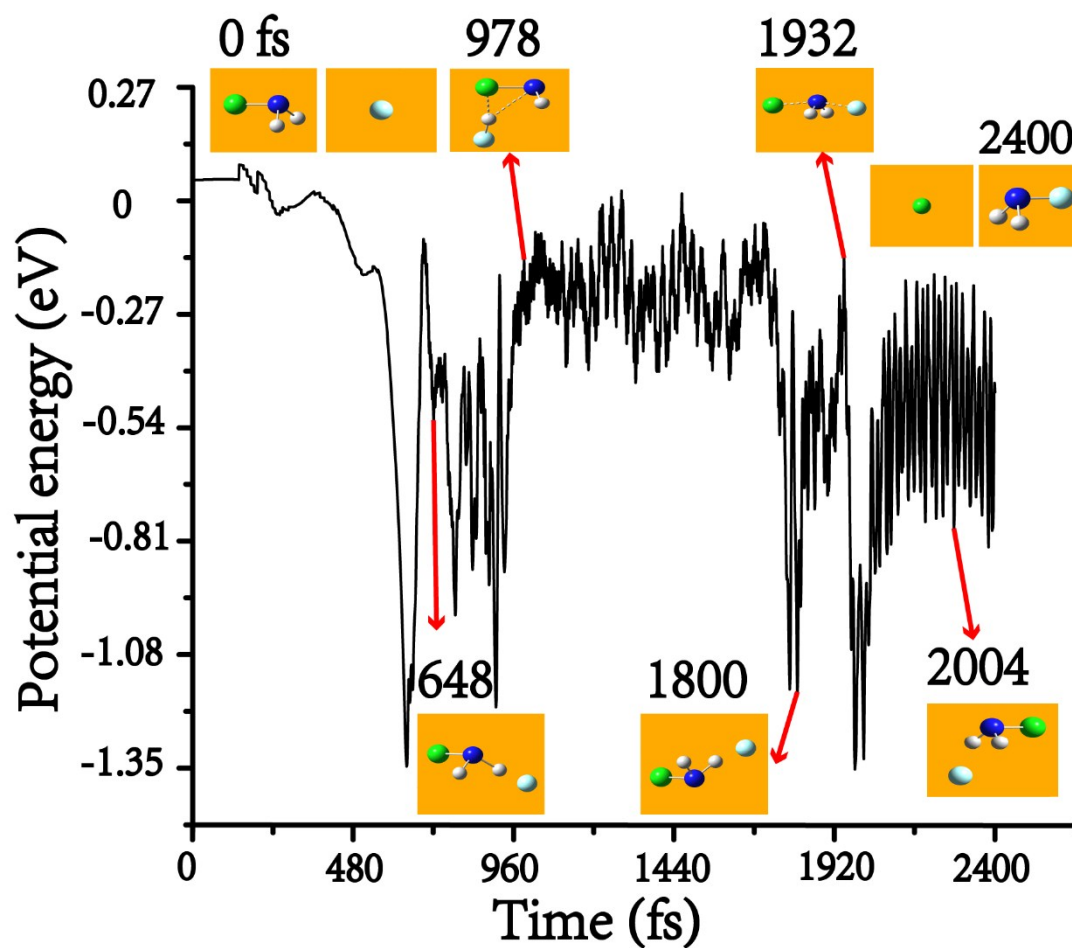

Figure S3. Potential energy vs. time from another PAR&BAR reactive trajectory. The labelled points along the reactive trajectory are used to search and locate the stationary points of the PAR&BAR potential energy profile in Figure 4, leading to the stationary points: RS, MIN1, TS3, MIN2, TS1, MIN4 and PS1, respectively.

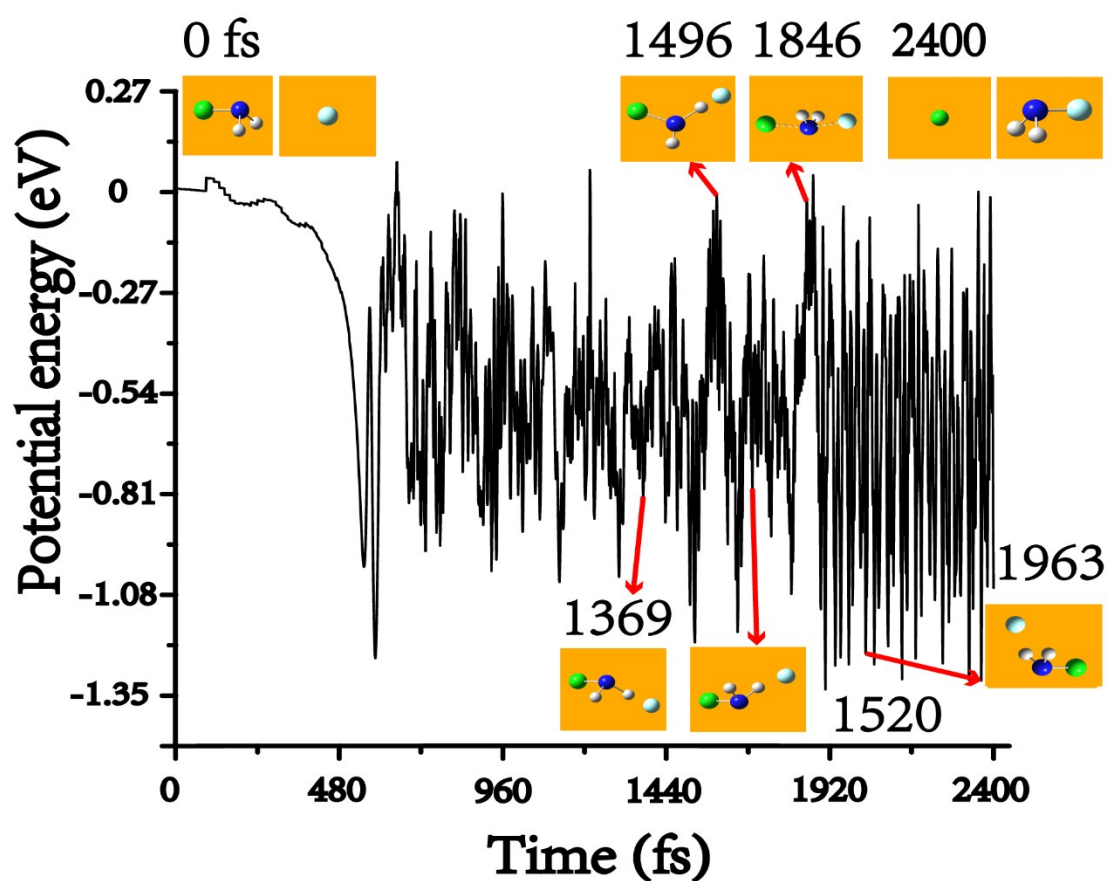

Figure S4. Potential energy vs. time from a double-inversion reactive trajectory. The labelled points along the reactive trajectory are used to search and locate the stationary points of the double-inversion potential energy profile in Figure 4, leading to the stationary points: RS, MIN1, TS2, MIN2, TS1, MIN4 and PS1, respectively.

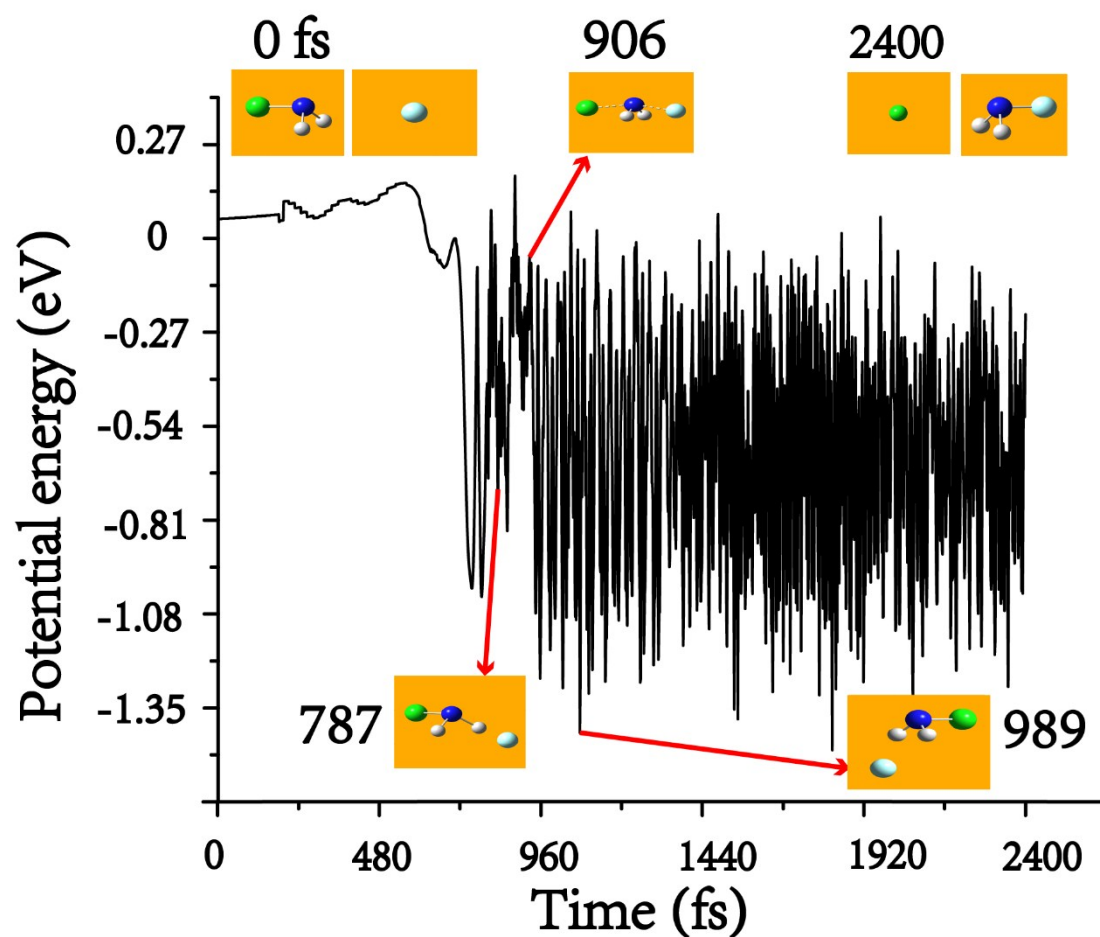

Figure S5. Potential energy vs. time from a hydrogen-bond mechanism reactive trajectory. The labelled points along the reactive trajectory are used to search and locate the stationary points of the hydrogen-bond potential energy profile in Figure 4, leading to the stationary points: RS, MIN1, TS1, MIN4 and PS1, respectively.

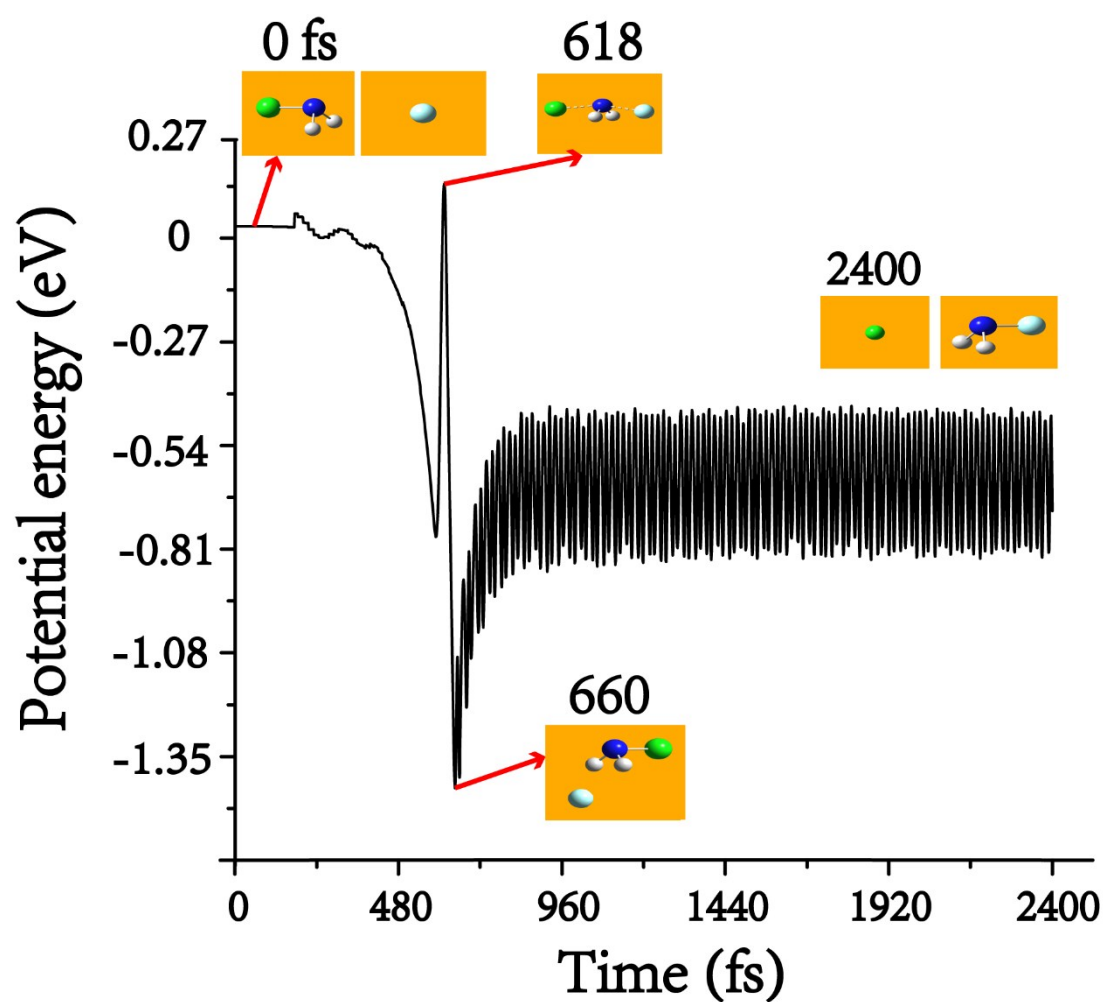

Figure S6. Potential energy vs. time from a direct rebound reactive trajectory. The labelled points along this reactive trajectory are used to search and locate the stationary points of the potential energy profile in Figure 4, leading to the stationary points: RS, TS1, MIN4 and PS1, respectively.

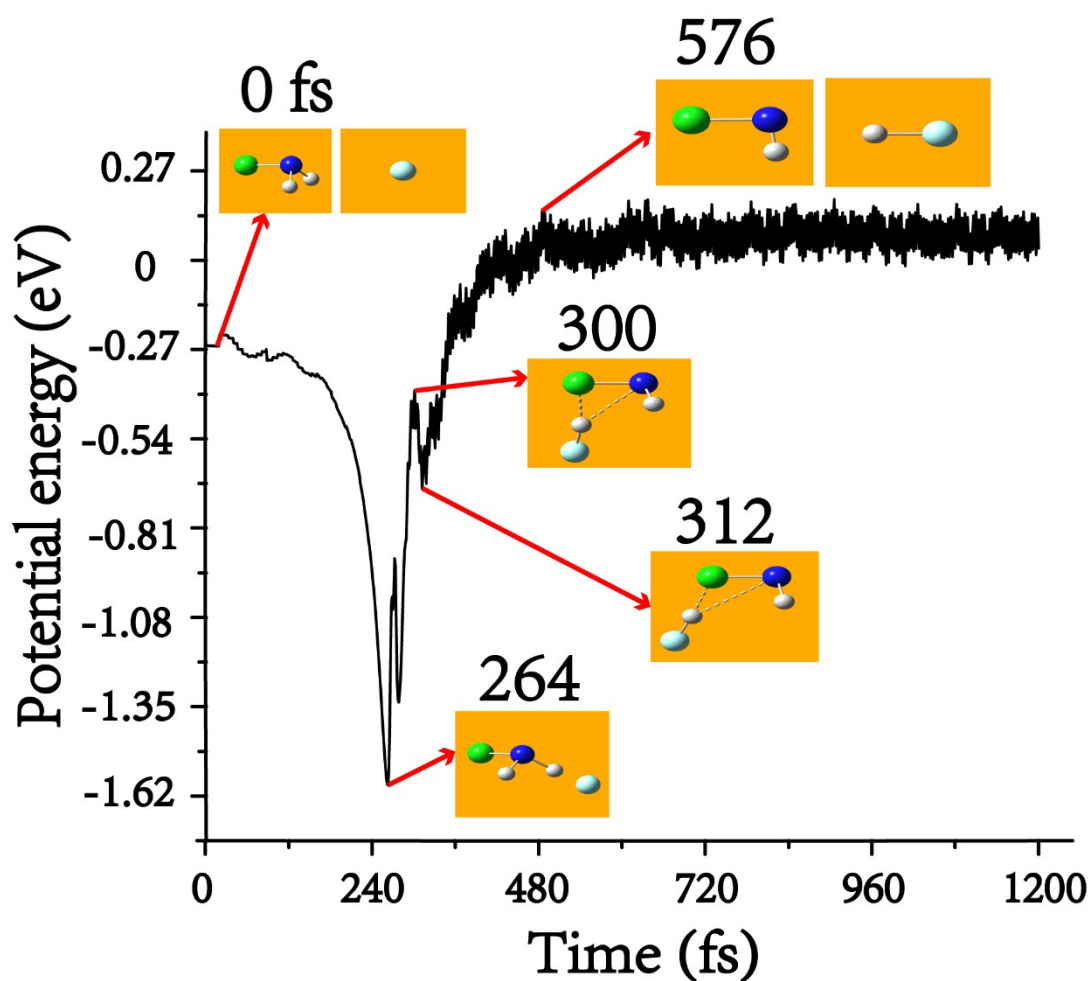

Figure S7. Potential energy vs. time from an abstraction reactive trajectory. The labelled points along this reactive trajectory are used to search and locate the stationary points of the abstraction potential energy profile in Figure 4, leading to the stationary points: RS, MIN1, TS3, MIN3 and PS2, respectively.



Table S1. Relative energies in kcal/mol of stationary points from our DFT/aug-cc-pVDZ and CCSD(T)-F12/aug-cc-pVTZ results and the benchmark results at the CCSD(T)-F12b/aug-cc-pV5Z(-PP) level of theory<sup>a</sup>.

|                                             | DFT/aug-cc-pVDZ | CCSD(T)-F12/aug-cc-pVTZ <sup>b</sup> | CCSD(T)-F12b/aug-cc-pV5Z(-PP) |
|---------------------------------------------|-----------------|--------------------------------------|-------------------------------|
| RS ( $\text{F}^- + \text{NH}_2\text{Cl}$ )  | 0.0             | 0.0                                  | 0.0                           |
| MIN1                                        | -33.1           | -30.6                                | -30.2                         |
| MIN2                                        | -33.1           | -30.6                                | -30.0                         |
| MIN3                                        | -12.6           | -10.5                                | -10.2                         |
| MIN4                                        | -36.5           | -30.0                                | -29.6                         |
| TS1                                         | -14.2           | -12.5                                | -11.9                         |
| TS2                                         | -27.4           | -23.7                                | NA                            |
| TS3                                         | -12.4           | -10.1                                | -9.7                          |
| PS1 ( $\text{Cl}^- + \text{NH}_2\text{F}$ ) | -20.3           | -14.0                                | -13.6                         |
| PS2 ( $\text{HF} + \text{NHCl}^-$ )         | 5.3             | 7.1                                  | 7.3                           |

- a. From Ref. 41. Benchmark classical relative energies obtained as CCSD(T)-F12b/aug-cc-pV5Z(-PP) with core correlation effects.

Table S2. Cartesian coordinates( $\text{\AA}$ ) of the stationary points at the CCSD(T)/aug-cc-pVTZ level of theory.

RS (NH<sub>2</sub>Cl)

|    |        |        |        |
|----|--------|--------|--------|
| H  | -0.938 | 0.005  | 1.391  |
| H  | 0.465  | 0.815  | 1.391  |
| N  | 0.044  | -0.077 | 1.133  |
| Cl | 0.009  | -0.016 | -0.630 |

MIN1

|    |        |        |        |
|----|--------|--------|--------|
| H  | 1.036  | 0.011  | 0.224  |
| H  | 0.037  | -1.128 | 0.961  |
| N  | 0.083  | -0.119 | 0.809  |
| Cl | -1.230 | 0.089  | -0.386 |
| F  | 2.262  | 0.068  | -0.363 |

MIN2

|    |        |        |        |
|----|--------|--------|--------|
| H  | 1.036  | 0.011  | -0.224 |
| H  | 0.037  | -1.128 | -0.961 |
| N  | 0.083  | -0.119 | -0.809 |
| Cl | -1.230 | 0.089  | 0.386  |
| F  | 2.262  | 0.068  | 0.363  |

MIN3

|    |        |        |        |
|----|--------|--------|--------|
| H  | 0.137  | 1.301  | 0.042  |
| H  | -1.384 | -1.556 | 0.417  |
| N  | -0.692 | -1.629 | -0.342 |
| Cl | 0.619  | -0.600 | 0.442  |
| F  | -0.029 | 2.231  | -0.091 |

# MIN4

|    |        |        |        |
|----|--------|--------|--------|
| H  | -0.578 | -0.775 | -0.291 |
| H  | -0.581 | 0.777  | -0.292 |
| N  | -1.247 | 0.000  | -0.301 |
| Cl | 1.667  | -0.002 | 0.774  |
| F  | -1.680 | -0.001 | -1.693 |

# TS1

|    |        |        |        |
|----|--------|--------|--------|
| H  | -0.227 | -0.802 | -0.632 |
| H  | -0.216 | 0.792  | -0.657 |
| N  | -0.518 | 0.006  | -0.088 |
| Cl | 1.377  | 0.009  | 0.931  |
| F  | -1.917 | -0.006 | -1.429 |

# TS2

|    |        |        |        |
|----|--------|--------|--------|
| H  | -1.692 | -0.270 | -0.794 |
| H  | -0.216 | 1.282  | -0.054 |
| N  | -0.815 | 0.034  | -0.384 |
| Cl | 0.033  | -1.498 | -0.078 |
| F  | 0.186  | 2.205  | 0.173  |

# TS3

|    |        |        |        |
|----|--------|--------|--------|
| H  | 0.674  | 0.790  | 0.709  |
| H  | 0.254  | -2.076 | 0.145  |
| N  | -0.542 | -1.540 | 0.527  |
| Cl | -0.514 | -0.167 | -0.700 |
| F  | 1.239  | 1.346  | 1.225  |

# PS1 (NH<sub>2</sub>F)

|   |        |        |        |
|---|--------|--------|--------|
| H | -0.922 | -0.022 | 0.933  |
| H | 0.480  | 0.787  | 0.934  |
| N | 0.065  | -0.112 | 0.684  |
| F | 0.000  | 0.000  | -0.742 |

PS2 (NHCl<sup>-</sup>)

|    |        |        |        |
|----|--------|--------|--------|
| N  | 1.6276 | -1.866 | -0.560 |
| H  | 1.391  | -0.863 | -0.560 |
| Cl | 3.465  | -1.673 | -0.560 |

PS2 (HF)

|   |       |       |       |
|---|-------|-------|-------|
| F | 3.213 | 0.637 | 0.000 |
| H | 2.292 | 0.637 | 0.000 |

Table S3. Harmonic vibrational frequencies (cm<sup>-1</sup>) for the stationary points at the CCSD(T)-F12/aug-cc-pVTZ level of theory.

|     | MIN1   | MIN2   | MIN3   | MIN4   | TS1            | TS2            | TS3            |
|-----|--------|--------|--------|--------|----------------|----------------|----------------|
| ZPE | 5598.7 | 5598.7 | 5256.8 | 6156.1 | 5528.3         | 4897.9         | 5144.5         |
| 1   | 130.8  | 130.8  | 80.4   | 53.2   | 422.7 <i>i</i> | 441.6 <i>i</i> | 108.4 <i>i</i> |
| 2   | 393.9  | 393.9  | 166.7  | 113.0  | 235.2          | 115.3          | 186.9          |
| 3   | 511.2  | 511.2  | 213.5  | 164.4  | 260.1          | 340.3          | 250.6          |
| 4   | 615.9  | 615.9  | 507.4  | 857.6  | 317.9          | 664.8          | 516.9          |
| 5   | 1212.9 | 1212.9 | 776.5  | 1303.8 | 969.4          | 1067.9         | 585.0          |
| 6   | 1411.2 | 1411.2 | 812.5  | 1362.2 | 1067.3         | 1221.6         | 736.9          |
| 7   | 1597.7 | 1597.7 | 1244.7 | 1584.2 | 1530.9         | 1354.7         | 1246.0         |
| 8   | 1890.0 | 1890.0 | 3313.0 | 3414.2 | 3498.9         | 1964.2         | 3287.1         |
| 9   | 3434.3 | 3434.3 | 3398.8 | 3459.5 | 3599.5         | 3508.5         | 3588.0         |

|     | RS (NH <sub>2</sub> Cl) | PS1 (NH <sub>2</sub> F) | PS2 (NHCl <sup>-</sup> ) | PS2 (HF) |
|-----|-------------------------|-------------------------|--------------------------|----------|
| ZPE | 5765.9                  | 6032.8                  | 2521.4                   | 2045.6   |
| 1   | 670.8                   | 918.6                   | 511.7                    | 4091.2   |
| 2   | 1092.5                  | 1276.7                  | 1227.8                   |          |
| 3   | 1196.7                  | 1346.3                  | 3303.3                   |          |
| 4   | 1604.0                  | 1628.5                  |                          |          |
| 5   | 3436.6                  | 3399.2                  |                          |          |
| 6   | 3531.2                  | 3496.3                  |                          |          |
